# Supplementary material for: Synthesis and characterisation of luminescent fluorinated organoboron compounds
Source: Royal Society of Chemistry journal article supplement (doi:10.1039/b700317j), 2007-01-01
Supplement: b700317j.pdf [file b700317j.pdf]

## Supporting Information

### Manuscript: Synthesis and Characterization of Luminescent Fluorinated Organoboron Compounds

**Authors:** Juri Ugolotti, Sondra Hellstrom, George J.P. Britovsek, Tim S. Jones, Patricia Hunt and Andrew J.P. White

**Fig. S1** The molecular structure of one (**I**) of the two independent complexes present in the crystals of **1** (50% probability ellipsoids).

**Fig. S2** The molecular structure of one (**II**) of the two independent complexes present in the crystals of **1**.

**Fig. S3** The molecular structure of one (**II**) of the two independent complexes present in the crystals of **1** (50% probability ellipsoids).

**Fig. S4** Overlay of the two independent complexes (**I** and **II**) present in the crystals of **1**. The r.m.s. fit of the boron and oxygen atoms, and of all three C<sub>6</sub>F<sub>5</sub> rings, is *ca.* 0.12 Å.

**Fig. S5** The molecular structure of **2** (50% probability ellipsoids).

**Fig. S6** The molecular structure of **4** (50% probability ellipsoids).

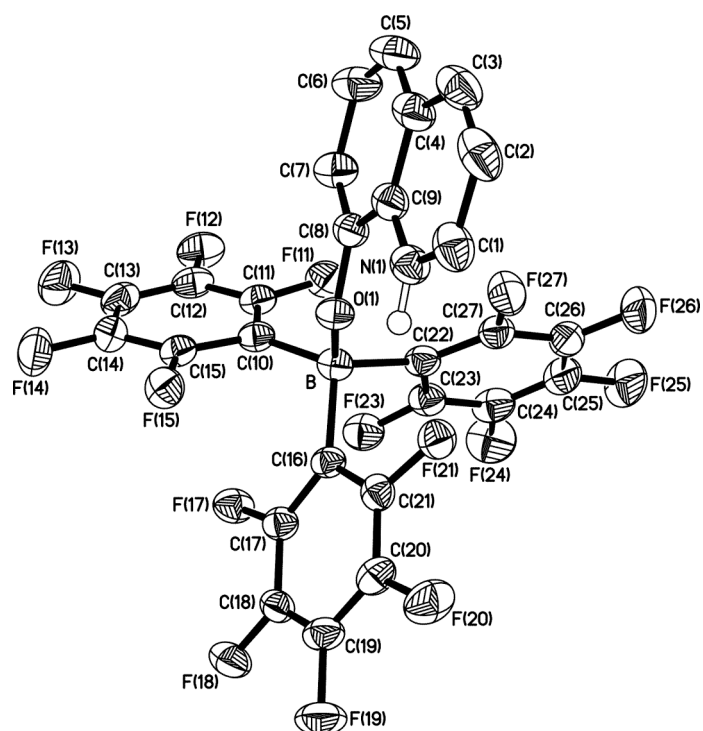

Fig. S1

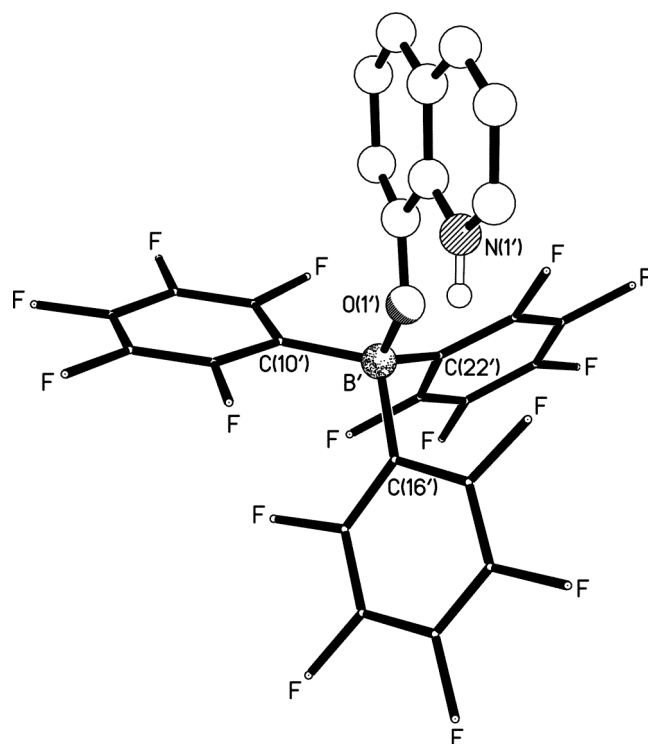

Fig. S2

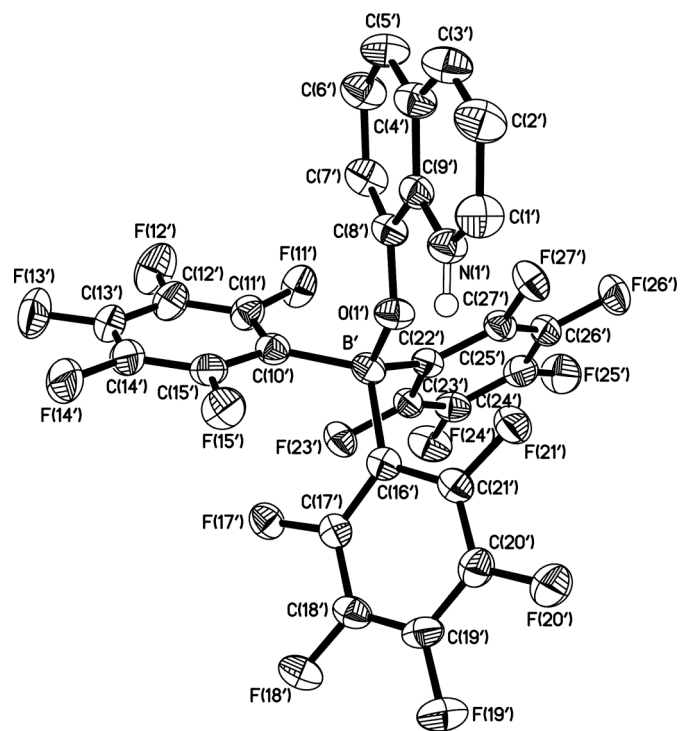

Fig. S3

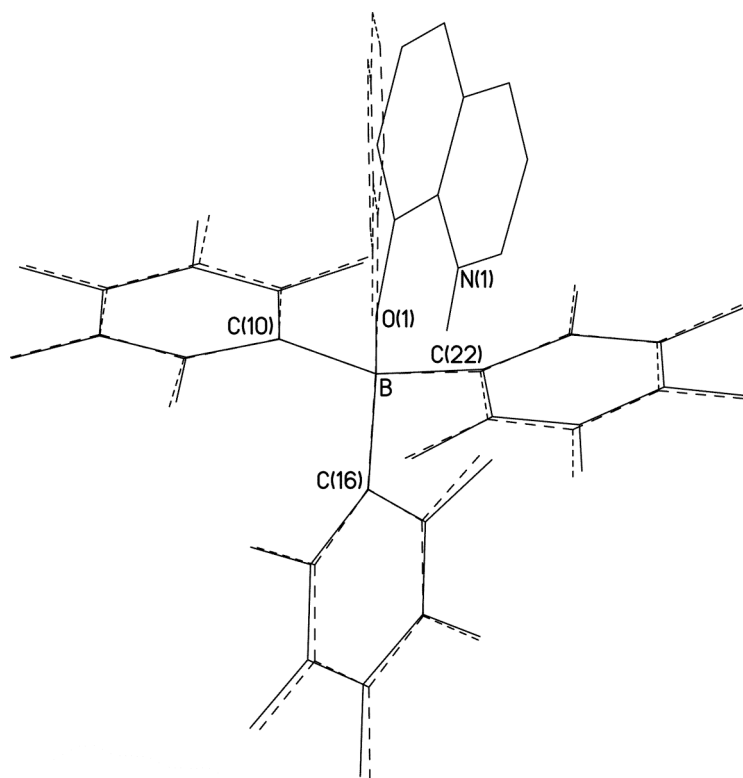

Fig. S4

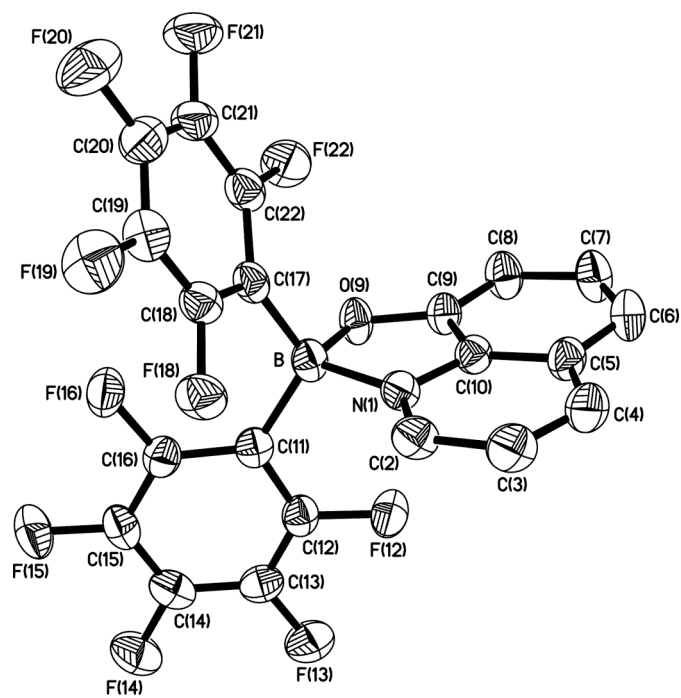

Fig. S5

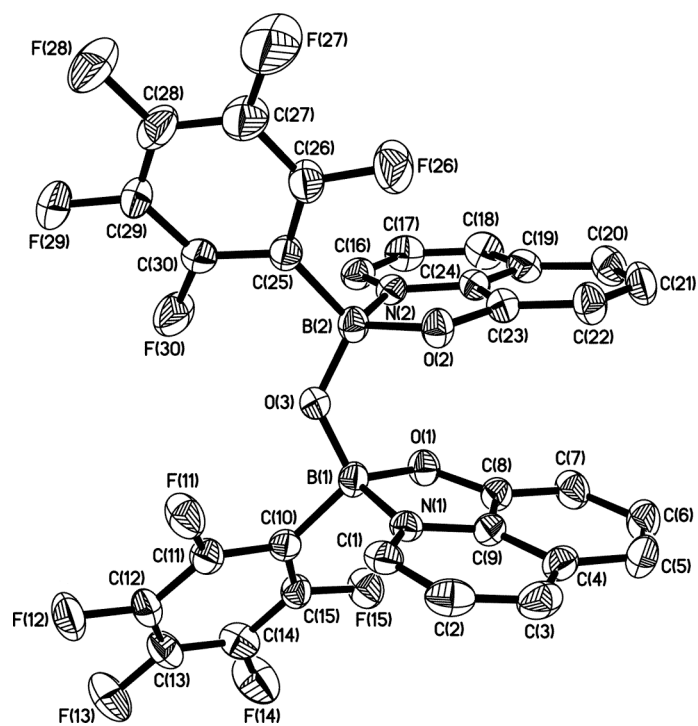

Fig. S6
